# Supplementary material for: Love the one you’re with: replicate viral adaptations converge on the same phenotypic change
Source: PeerJ. 2016 Jul 19;4:e2227. doi: 10.7717/peerj.2227 (PMC4958007; doi:10.7717/peerj.2227)
Supplement: Supplemental Information 6 [file peerj-04-2227-s006.xlsx]

## Sheet: mut.nuc.AA.m.3
mut.DNA	site	wt	mut	gene.1	AA.site.1	from.1	to.1	anc.codon1	mut.codon1	gene.2	AA.site.2	from.2	to.2	anc.codon2	mut.codon2	all.silent	in.feature	de.novo	trans.v	anc.usage1	mut.usage1	del.usage1	anc.usage2	mut.usage2	del.usage2	feat.cat
382.A.G	382	A	G	A	108	sil	sil	AAA	AAG	NA	NA	NA	NA	NA	NA	1	-	1	sit	1.45	0.55	-0.9	NA	NA	NA	A.108.NA.NA
449.A.G	449	A	G	A	131	T	A	ACA	GCA	NA	NA	NA	NA	NA	NA	0	-	1	sit	0.19	1.09	0.9	NA	NA	NA	A.131.NA.NA
454.C.T	454	C	T	A	132	sil	sil	GTC	GTT	NA	NA	NA	NA	NA	NA	1	-	1	sit	0.3	2.07	1.77	NA	NA	NA	A.132.NA.NA
535.C.T	535	C	T	A	159	sil	sil	CCC	CCT	NA	NA	NA	NA	NA	NA	1	-	1	sit	0.05	0.59	0.54	NA	NA	NA	A.159.NA.NA
976.C.T	976	C	T	A	306	sil	sil	CAC	CAT	A*	93	sil	sil	CAC	CAT	1	-	1	sit	1.39	0.61	-0.78	1.39	0.61	-0.78	A.306.A*. 93
994.C.T	994	C	T	A	312	sil	sil	CGC	CGT	A*	99	sil	sil	CGC	CGT	1	-	1	sit	1.8	4.13	2.33	1.8	4.13	2.33	A.312.A*. 99
997.A.G	997	A	G	A	313	sil	sil	ACA	ACG	A*	100	sil	sil	ACA	ACG	1	-	1	sit	0.19	0.17	-0.02	0.19	0.17	-0.02	A.313.A*.100
1027.C.T	1027	C	T	A	323	sil	sil	TTC	TTT	A*	110	sil	sil	TTC	TTT	1	-	1	sit	1.55	0.45	-1.1	1.55	0.45	-1.1	A.323.A*.110
1171.A.G	1171	A	G	A	371	sil	sil	GAA	GAG	A*	158	sil	sil	GAA	GAG	1	-	1	sit	1.51	0.49	-1.02	1.51	0.49	-1.02	A.371.A*.158
1188.C.T	1188	C	T	A	377	S	L	TCG	TTG	A*	164	S	L	TCG	TTG	0	-	1	sit	0.06	0.25	0.19	0.06	0.25	0.19	A.377.A*.164
1727.A.G	1727	A	G	K	30	sil	sil	GAA	GAG	C	3	K	R	AAA	AGA	0	-	1	sit	1.51	0.49	-1.02	1.45	0.03	-1.42	K. 30.C. 3
1908.T.C	1908	T	C	C	63	sil	sil	CTT	CTC	NA	NA	NA	NA	NA	NA	1	D.pro	1	sit	0.3	0.23	-0.07	NA	NA	NA	D.pro
1909.G.C	1909	G	C	C	64	D	H	GAC	CAC	NA	NA	NA	NA	NA	NA	0	D.pro	1	vers	1.31	1.39	0.08	NA	NA	NA	D.pro
1909.G.T	1909	G	T	C	64	D	Y	GAC	TAC	NA	NA	NA	NA	NA	NA	0	D.pro	1	vers	1.31	1.52	0.21	NA	NA	NA	D.pro
1909.G.A	1909	G	A	C	64	D	N	GAC	AAC	NA	NA	NA	NA	NA	NA	0	D.pro	1	sit	1.31	1.75	0.44	NA	NA	NA	D.pro
1910.A.G	1910	A	G	C	64	D	G	GAC	GGC	NA	NA	NA	NA	NA	NA	0	D.pro	1	sit	1.31	1.39	0.08	NA	NA	NA	D.pro
1911.C.T	1911	C	T	C	64	sil	sil	GAC	GAT	NA	NA	NA	NA	NA	NA	1	D.pro	1	sit	1.31	0.69	-0.62	NA	NA	NA	D.pro
1911.C.A	1911	C	A	C	64	D	E	GAC	GAA	NA	NA	NA	NA	NA	NA	0	D.pro	1	vers	1.31	1.51	0.2	NA	NA	NA	D.pro
1914.A.G	1914	A	G	C	65	I	M	ATA	ATG	NA	NA	NA	NA	NA	NA	0	-	1	sit	0.01	1	0.99	NA	NA	NA	C. 65.NA.NA
1927.G.T	1927	G	T	C	70	G	C	GGC	TGC	NA	NA	NA	NA	NA	NA	0	-	1	vers	1.39	1.23	-0.16	NA	NA	NA	C. 70.NA.NA
1932.A.G	1932	A	G	C	71	sil	sil	CTA	CTG	NA	NA	NA	NA	NA	NA	1	D.pro	1	sit	0.01	5.07	5.06	NA	NA	NA	D.pro
1935.A.G	1935	A	G	C	72	sil	sil	TTA	TTG	NA	NA	NA	NA	NA	NA	1	D.pro	1	sit	0.14	0.25	0.11	NA	NA	NA	D.pro
1941.A.G	1941	A	G	C	74	sil	sil	ACA	ACG	NA	NA	NA	NA	NA	NA	1	-	1	sit	0.19	0.17	-0.02	NA	NA	NA	C. 74.NA.NA
1958.A.G	1958	A	G	C	80	N	S	AAC	AGC	NA	NA	NA	NA	NA	NA	0	-	1	sit	1.75	1.4	-0.35	NA	NA	NA	C. 80.NA.NA
1979.T.C	1979	T	C	D	2	S	P	TCT	CCT	NA	NA	NA	NA	NA	NA	0	-	1	sit	2.54	0.59	-1.95	NA	NA	NA	D. 2.NA.NA
1986.C.T	1986	C	T	D	4	S	L	TCA	TTA	NA	NA	NA	NA	NA	NA	0	-	1	sit	0.19	0.14	-0.05	NA	NA	NA	D. 4.NA.NA
2029.C.T	2029	C	T	D	18	sil	sil	ATC	ATT	NA	NA	NA	NA	NA	NA	1	-	1	sit	2.27	0.72	-1.55	NA	NA	NA	D. 18.NA.NA
2088.C.T	2088	C	T	D	38	T	I	ACT	ATT	NA	NA	NA	NA	NA	NA	0	-	1	sit	1.89	0.72	-1.17	NA	NA	NA	D. 38.NA.NA
2094.A.G	2094	A	G	D	40	D	G	GAC	GGC	NA	NA	NA	NA	NA	NA	0	-	1	sit	1.31	1.39	0.08	NA	NA	NA	D. 40.NA.NA
2100.T.C	2100	T	C	D	42	V	A	GTC	GCC	NA	NA	NA	NA	NA	NA	0	-	1	sit	0.3	0.32	0.02	NA	NA	NA	D. 42.NA.NA
2131.C.T	2131	C	T	D	52	sil	sil	CGC	CGT	NA	NA	NA	NA	NA	NA	1	-	1	sit	1.8	4.13	2.33	NA	NA	NA	D. 52.NA.NA
2134.T.C	2134	T	C	D	53	sil	sil	CGT	CGC	NA	NA	NA	NA	NA	NA	1	-	1	sit	4.13	1.8	-2.33	NA	NA	NA	D. 53.NA.NA
2138.A.G	2138	A	G	D	55	I	V	ATC	GTC	NA	NA	NA	NA	NA	NA	0	-	1	sit	2.27	0.3	-1.97	NA	NA	NA	D. 55.NA.NA
2146.C.T	2146	C	T	D	57	sil	sil	GCC	GCT	NA	NA	NA	NA	NA	NA	1	-	1	sit	0.32	1.83	1.51	NA	NA	NA	D. 57.NA.NA
2147.T.A	2147	T	A	D	58	C	S	TGC	AGC	NA	NA	NA	NA	NA	NA	0	-	1	vers	1.23	1.4	0.17	NA	NA	NA	D. 58.NA.NA
2152.A.G	2152	A	G	D	59	sil	sil	GTA	GTG	NA	NA	NA	NA	NA	NA	1	-	1	sit	1.14	0.48	-0.66	NA	NA	NA	D. 59.NA.NA
2158.A.G	2158	A	G	D	61	sil	sil	GGA	GGG	E	2	E	G	GAA	GGA	0	-	1	sit	0.03	0.06	0.03	1.51	0.03	-1.48	D. 61.E. 2
2207.A.G	2207	A	G	D	78	I	V	ATT	GTT	E	18	sil	sil	TTA	TTG	0	-	1	sit	0.72	2.07	1.35	0.14	0.25	0.11	D. 78.E. 18
2264.A.G	2264	A	G	D	97	I	V	ATC	GTC	E	37	sil	sil	TCA	TCG	0	-	1	sit	2.27	0.3	-1.97	0.19	0.06	-0.13	D. 97.E. 37
2266.C.T	2266	C	T	D	97	sil	sil	ATC	ATT	E	38	S	L	TCA	TTA	0	-	1	sit	2.27	0.72	-1.55	0.19	0.14	-0.05	D. 97.E. 38
2287.C.T	2287	C	T	D	104	sil	sil	ACC	ACT	E	45	P	L	CCG	CTG	0	-	1	sit	1.75	1.89	0.14	2.85	5.07	2.22	D.104.E. 45
2311.A.G	2311	A	G	D	112	sil	sil	GAA	GAG	E	53	N	S	AAC	AGC	0	-	1	sit	1.51	0.49	-1.02	1.75	1.4	-0.35	D.112.E. 53
2312.C.T	2312	C	T	D	113	R	C	CGC	TGC	E	53	sil	sil	AAC	AAT	0	-	1	sit	1.8	1.23	-0.57	1.75	0.25	-1.5	D.113.E. 53
2313.G.A	2313	G	A	D	113	R	H	CGC	CAC	E	54	A	T	GCC	ACC	0	-	1	sit	1.8	1.39	-0.41	0.32	1.75	1.43	D.113.E. 54
2314.C.T	2314	C	T	D	113	sil	sil	CGC	CGT	E	54	A	V	GCC	GTC	0	-	1	sit	1.8	4.13	2.33	0.32	0.3	-0.02	D.113.E. 54
2324.G.T	2324	G	T	D	117	A	S	GCC	TCC	E	57	K	N	AAG	AAT	0	-	1	vers	0.32	1.52	1.2	0.55	0.25	-0.3	D.117.E. 57
2332.A.G	2332	A	G	D	119	sil	sil	GAA	GAG	E	60	N	S	AAC	AGC	0	-	1	sit	1.51	0.49	-1.02	1.75	1.4	-0.35	D.119.E. 60
2335.G.T	2335	G	T	D	120	sil	sil	CTG	CTT	E	61	C	F	TGT	TTT	0	-	1	vers	5.07	0.3	-4.77	0.77	0.45	-0.32	D.120.E. 61
2338.C.T	2338	C	T	D	121	sil	sil	TTC	TTT	E	62	S	L	TCG	TTG	0	-	1	sit	1.55	0.45	-1.1	0.06	0.25	0.19	D.121.E. 62
2341.C.T	2341	C	T	D	122	sil	sil	GCC	GCT	E	63	P	L	CCT	CTT	0	-	1	sit	0.32	1.83	1.51	0.59	0.3	-0.29	D.122.E. 63
2357.C.T	2357	C	T	D	128	R	C	CGC	TGC	E	68	sil	sil	TTC	TTT	0	-	1	sit	1.8	1.23	-0.57	1.55	0.45	-1.1	D.128.E. 68
2361.C.G	2361	C	G	D	129	A	G	GCC	GGC	E	70	P	A	CCG	GCG	0	-	1	vers	0.32	1.39	1.07	2.85	0.76	-2.09	D.129.E. 70
2362.C.T	2362	C	T	D	129	sil	sil	GCC	GCT	E	70	P	L	CCG	CTG	0	-	1	sit	0.32	1.83	1.51	2.85	5.07	2.22	D.129.E. 70
2372.G.T	2372	G	T	D	133	D	Y	GAT	TAT	E	73	K	N	AAG	AAT	0	-	1	vers	0.69	0.48	-0.21	0.55	0.25	-0.3	D.133.E. 73
2386.C.T	2386	C	T	D	137	sil	sil	CAC	CAT	E	78	T	M	ACG	ATG	0	-	1	sit	1.39	0.61	-0.78	0.17	1	0.83	D.137.E. 78
2393.A.G	2393	A	G	D	140	T	A	ACA	GCA	E	80	sil	sil	AAA	AAG	0	-	1	sit	0.19	1.09	0.9	1.45	0.55	-0.9	D.140.E. 80
2397.A.G	2397	A	G	D	141	N	S	AAC	AGC	E	82	T	A	ACA	GCA	0	-	1	sit	1.75	1.4	-0.35	0.19	1.09	0.9	D.141.E. 82
2398.C.T	2398	C	T	D	141	sil	sil	AAC	AAT	E	82	T	I	ACA	ATA	0	-	1	sit	1.75	0.25	-1.5	0.19	0.01	-0.18	D.141.E. 82
2401.C.T	2401	C	T	D	142	sil	sil	ATC	ATT	E	83	S	F	TCC	TTC	0	-	1	sit	2.27	0.72	-1.55	1.52	1.55	0.03	D.142.E. 83
2407.A.T	2407	A	T	D	144	E	D	GAA	GAT	E	85	N	I	AAC	ATC	0	-	1	vers	1.51	0.69	-0.82	1.75	2.27	0.52	D.144.E. 85
2417.G.T	2417	G	T	D	148	A	S	GCT	TCT	E	88	sil	sil	GTG	GTT	0	-	1	vers	1.83	2.54	0.71	0.48	2.07	1.59	D.148.E. 88
2444.A.G	2444	A	G	E	97	*	W	TGA	TGG	NA	NA	NA	NA	NA	NA	0	-	1	sit	0.15	1	0.85	NA	NA	NA	E. 97.NA.NA
2520.C.T	2520	C	T	J	15	A	V	GCC	GTC	NA	NA	NA	NA	NA	NA	0	-	1	sit	0.32	0.3	-0.02	NA	NA	NA	J. 15.NA.NA
2534.G.T	2534	G	T	J	20	V	L	GTA	TTA	NA	NA	NA	NA	NA	NA	0	-	1	vers	1.14	0.14	-1	NA	NA	NA	J. 20.NA.NA
2534.T.G	2534	T	G	J	20	L	V	TTA	GTA	NA	NA	NA	NA	NA	NA	0	-	1	vers	0.14	1.14	1	NA	NA	NA	J. 20.NA.NA
2563.G.C	2563	G	C	NA	NA	NA	NA	NA	NA	NA	NA	NA	NA	NA	NA	NA	-	1	vers	NA	NA	NA	NA	NA	NA	NA.NA.NA.NA
2574.G.A	2574	G	A	NA	NA	NA	NA	NA	NA	NA	NA	NA	NA	NA	NA	NA	J.term	1	sit	NA	NA	NA	NA	NA	NA	J.term
2575.T.C	2575	T	C	NA	NA	NA	NA	NA	NA	NA	NA	NA	NA	NA	NA	NA	J.term	1	sit	NA	NA	NA	NA	NA	NA	J.term
2577.C.T	2577	C	T	NA	NA	NA	NA	NA	NA	NA	NA	NA	NA	NA	NA	NA	J.term	1	sit	NA	NA	NA	NA	NA	NA	J.term
2578.C.T	2578	C	T	NA	NA	NA	NA	NA	NA	NA	NA	NA	NA	NA	NA	NA	J.term	1	sit	NA	NA	NA	NA	NA	NA	J.term
2609.G.A	2609	G	A	F	3	V	I	GTT	ATT	NA	NA	NA	NA	NA	NA	0	-	1	sit	2.07	0.72	-1.35	NA	NA	NA	F. 3.NA.NA
2615.G.A	2615	G	A	F	5	A	T	GCT	ACT	NA	NA	NA	NA	NA	NA	0	-	1	sit	1.83	1.89	0.06	NA	NA	NA	F. 5.NA.NA
2616.C.T	2616	C	T	F	5	T	I	ACT	ATT	NA	NA	NA	NA	NA	NA	0	-	1	sit	1.89	0.72	-1.17	NA	NA	NA	F. 5.NA.NA
2626.C.T	2626	C	T	F	8	sil	sil	GAC	GAT	NA	NA	NA	NA	NA	NA	1	-	1	sit	1.31	0.69	-0.62	NA	NA	NA	F. 8.NA.NA
2630.G.T	2630	G	T	F	10	V	L	GTA	TTA	NA	NA	NA	NA	NA	NA	0	-	1	vers	1.14	0.14	-1	NA	NA	NA	F. 10.NA.NA
2634.C.T	2634	C	T	F	11	P	L	CCT	CTT	NA	NA	NA	NA	NA	NA	0	-	1	sit	0.59	0.3	-0.29	NA	NA	NA	F. 11.NA.NA
2640.A.G	2640	A	G	F	13	D	G	GAC	GGC	NA	NA	NA	NA	NA	NA	0	-	1	sit	1.31	1.39	0.08	NA	NA	NA	F. 13.NA.NA
2664.C.T	2664	C	T	F	21	A	V	GCT	GTT	NA	NA	NA	NA	NA	NA	0	-	1	sit	1.83	2.07	0.24	NA	NA	NA	F. 21.NA.NA
2867.A.G	2867	A	G	F	89	I	V	ATT	GTT	NA	NA	NA	NA	NA	NA	0	-	1	sit	0.72	2.07	1.35	NA	NA	NA	F. 89.NA.NA
3032.A.G	3032	A	G	F	144	T	A	ACT	GCT	NA	NA	NA	NA	NA	NA	0	-	1	sit	1.89	1.83	-0.06	NA	NA	NA	F.144.NA.NA
3038.G.T	3038	G	T	F	146	A	S	GCT	TCT	NA	NA	NA	NA	NA	NA	0	-	1	vers	1.83	2.54	0.71	NA	NA	NA	F.146.NA.NA
3115.G.A	3115	G	A	F	171	sil	sil	GCG	GCA	NA	NA	NA	NA	NA	NA	1	-	1	sit	0.76	1.09	0.33	NA	NA	NA	F.171.NA.NA
3134.C.T	3134	C	T	F	178	R	C	CGT	TGT	NA	NA	NA	NA	NA	NA	0	-	1	sit	4.13	0.77	-3.36	NA	NA	NA	F.178.NA.NA
3134.T.C	3134	T	C	F	178	C	R	TGT	CGT	NA	NA	NA	NA	NA	NA	0	-	1	sit	0.77	4.13	3.36	NA	NA	NA	F.178.NA.NA
3137.A.G	3137	A	G	F	179	T	A	ACA	GCA	NA	NA	NA	NA	NA	NA	0	-	1	sit	0.19	1.09	0.9	NA	NA	NA	F.179.NA.NA
3147.A.G	3147	A	G	F	182	N	S	AAC	AGC	NA	NA	NA	NA	NA	NA	0	-	1	sit	1.75	1.4	-0.35	NA	NA	NA	F.182.NA.NA
3151.G.T	3151	G	T	F	183	M	I	ATG	ATT	NA	NA	NA	NA	NA	NA	0	-	1	vers	1	0.72	-0.28	NA	NA	NA	F.183.NA.NA
3152.A.G	3152	A	G	F	184	T	A	ACT	GCT	NA	NA	NA	NA	NA	NA	0	-	1	sit	1.89	1.83	-0.06	NA	NA	NA	F.184.NA.NA
3184.C.T	3184	C	T	F	194	sil	sil	GGC	GGT	NA	NA	NA	NA	NA	NA	1	-	1	sit	1.39	2.53	1.14	NA	NA	NA	F.194.NA.NA
3265.G.T	3265	G	T	F	221	E	D	GAG	GAT	NA	NA	NA	NA	NA	NA	0	-	1	vers	0.49	0.69	0.2	NA	NA	NA	F.221.NA.NA
3408.A.G	3408	A	G	F	269	N	S	AAT	AGT	NA	NA	NA	NA	NA	NA	0	-	1	sit	0.25	0.29	0.04	NA	NA	NA	F.269.NA.NA
3560.A.G	3560	A	G	F	320	M	V	ATG	GTG	NA	NA	NA	NA	NA	NA	0	-	1	sit	1	0.48	-0.52	NA	NA	NA	F.320.NA.NA
3561.T.C	3561	T	C	F	320	M	T	ATG	ACG	NA	NA	NA	NA	NA	NA	0	-	1	sit	1	0.17	-0.83	NA	NA	NA	F.320.NA.NA
3562.G.T	3562	G	T	F	320	M	I	ATG	ATT	NA	NA	NA	NA	NA	NA	0	-	1	vers	1	0.72	-0.28	NA	NA	NA	F.320.NA.NA
3594.A.G	3594	A	G	F	331	K	R	AAA	AGA	NA	NA	NA	NA	NA	NA	0	-	1	sit	1.45	0.03	-1.42	NA	NA	NA	F.331.NA.NA
3597.A.C	3597	A	C	F	332	E	A	GAA	GCA	NA	NA	NA	NA	NA	NA	0	-	1	vers	1.51	1.09	-0.42	NA	NA	NA	F.332.NA.NA
3618.A.G	3618	A	G	F	339	D	G	GAT	GGT	NA	NA	NA	NA	NA	NA	0	-	1	sit	0.69	2.53	1.84	NA	NA	NA	F.339.NA.NA
3665.T.C	3665	T	C	F	355	S	P	TCT	CCT	NA	NA	NA	NA	NA	NA	0	-	1	sit	2.54	0.59	-1.95	NA	NA	NA	F.355.NA.NA
3800.G.T	3800	G	T	F	400	A	S	GCA	TCA	NA	NA	NA	NA	NA	NA	0	-	1	vers	1.09	0.19	-0.9	NA	NA	NA	F.400.NA.NA
3850.T.G	3850	T	G	F	416	I	M	ATT	ATG	NA	NA	NA	NA	NA	NA	0	-	1	vers	0.72	1	0.28	NA	NA	NA	F.416.NA.NA
3863.G.A	3863	G	A	F	421	D	N	GAC	AAC	NA	NA	NA	NA	NA	NA	0	-	1	sit	1.31	1.75	0.44	NA	NA	NA	F.421.NA.NA
3864.G.A	3864	G	A	F	421	G	D	GGC	GAC	NA	NA	NA	NA	NA	NA	0	-	1	sit	1.39	1.31	-0.08	NA	NA	NA	F.421.NA.NA
4048.A.G	4048	A	G	G	10	N	S	AAT	AGT	NA	NA	NA	NA	NA	NA	0	-	1	sit	0.25	0.29	0.04	NA	NA	NA	G. 10.NA.NA
4079.T.C	4079	T	C	G	20	sil	sil	GCT	GCC	NA	NA	NA	NA	NA	NA	1	-	1	sit	1.83	0.32	-1.51	NA	NA	NA	G. 20.NA.NA
4218.C.T	4218	C	T	G	67	P	S	CCA	TCA	NA	NA	NA	NA	NA	NA	0	-	1	sit	0.52	0.19	-0.33	NA	NA	NA	G. 67.NA.NA
4221.A.G	4221	A	G	G	68	T	A	ACA	GCA	NA	NA	NA	NA	NA	NA	0	-	1	sit	0.19	1.09	0.9	NA	NA	NA	G. 68.NA.NA
4362.A.G	4362	A	G	G	115	T	A	ACC	GCC	NA	NA	NA	NA	NA	NA	0	-	1	sit	1.75	0.32	-1.43	NA	NA	NA	G.115.NA.NA
4415.A.G	4415	A	G	G	132	sil	sil	TCA	TCG	NA	NA	NA	NA	NA	NA	1	-	1	sit	0.19	0.06	-0.13	NA	NA	NA	G.132.NA.NA
4467.A.G	4467	A	G	G	150	N	D	AAC	GAC	NA	NA	NA	NA	NA	NA	0	-	1	sit	1.75	1.31	-0.44	NA	NA	NA	G.150.NA.NA
4531.C.T	4531	C	T	G	171	T	I	ACC	ATC	NA	NA	NA	NA	NA	NA	0	-	1	sit	1.75	2.27	0.52	NA	NA	NA	G.171.NA.NA
4541.A.G	4541	A	G	G	174	sil	sil	CAA	CAG	NA	NA	NA	NA	NA	NA	1	-	1	sit	0.37	1.63	1.26	NA	NA	NA	G.174.NA.NA
4827.C.T	4827	C	T	H	88	sil	sil	ACC	ACT	NA	NA	NA	NA	NA	NA	1	-	1	sit	1.75	1.89	0.14	NA	NA	NA	H. 88.NA.NA
